# Supplementary material
Source: PubMed Central journal article supplement (PMC5278607)
Supplement: EMBR-17-800-s002.pdf [file EMBR-17-800-s002.pdf]

## Expanded View Figures

**Figure EV1. ORP5 and ORP8 localization at ER-PM and ER-mitochondria contact sites.**

- A, B IEM micrographs of HeLa cells transfected with EGFP-ORP5 (A) or EGFP-ORP8 (B) and immunogold labeled with anti-GFP (15 nm gold) and anti-PDI (10 nm gold), showing ORP5 and ORP8 localization at both ER-PM (black arrows) and ER-mitochondria contact sites (red arrows). Note that the bulk of ORP5 localizes to ER-PM contacts while the bulk of ORP8 localizes to non-cER membranes (arrowheads). Scale bar, 200 nm.
- C Representative electron micrographs of HeLa cells transfected with HRP-KDEL (Ctrl) or co-transfected with EGFP-ORP5. Arrows indicate ER-PM contact sites. Scale bar, 2  $\mu$ m.
- D Quantification of the percentage of ER-PM contact sites per cell (upper panel), the average number (middle panel) or length (lower panel) of ER-PM contact sites per cell of HeLa cells transfected with HRP-KDEL (Ctrl) or co-transfected with EGFP-ORP5 ( $n = 20$  cells). % ER-PM contact sites  $\pm$  SEM. \* $P < 0.001$  compared to Ctrl.

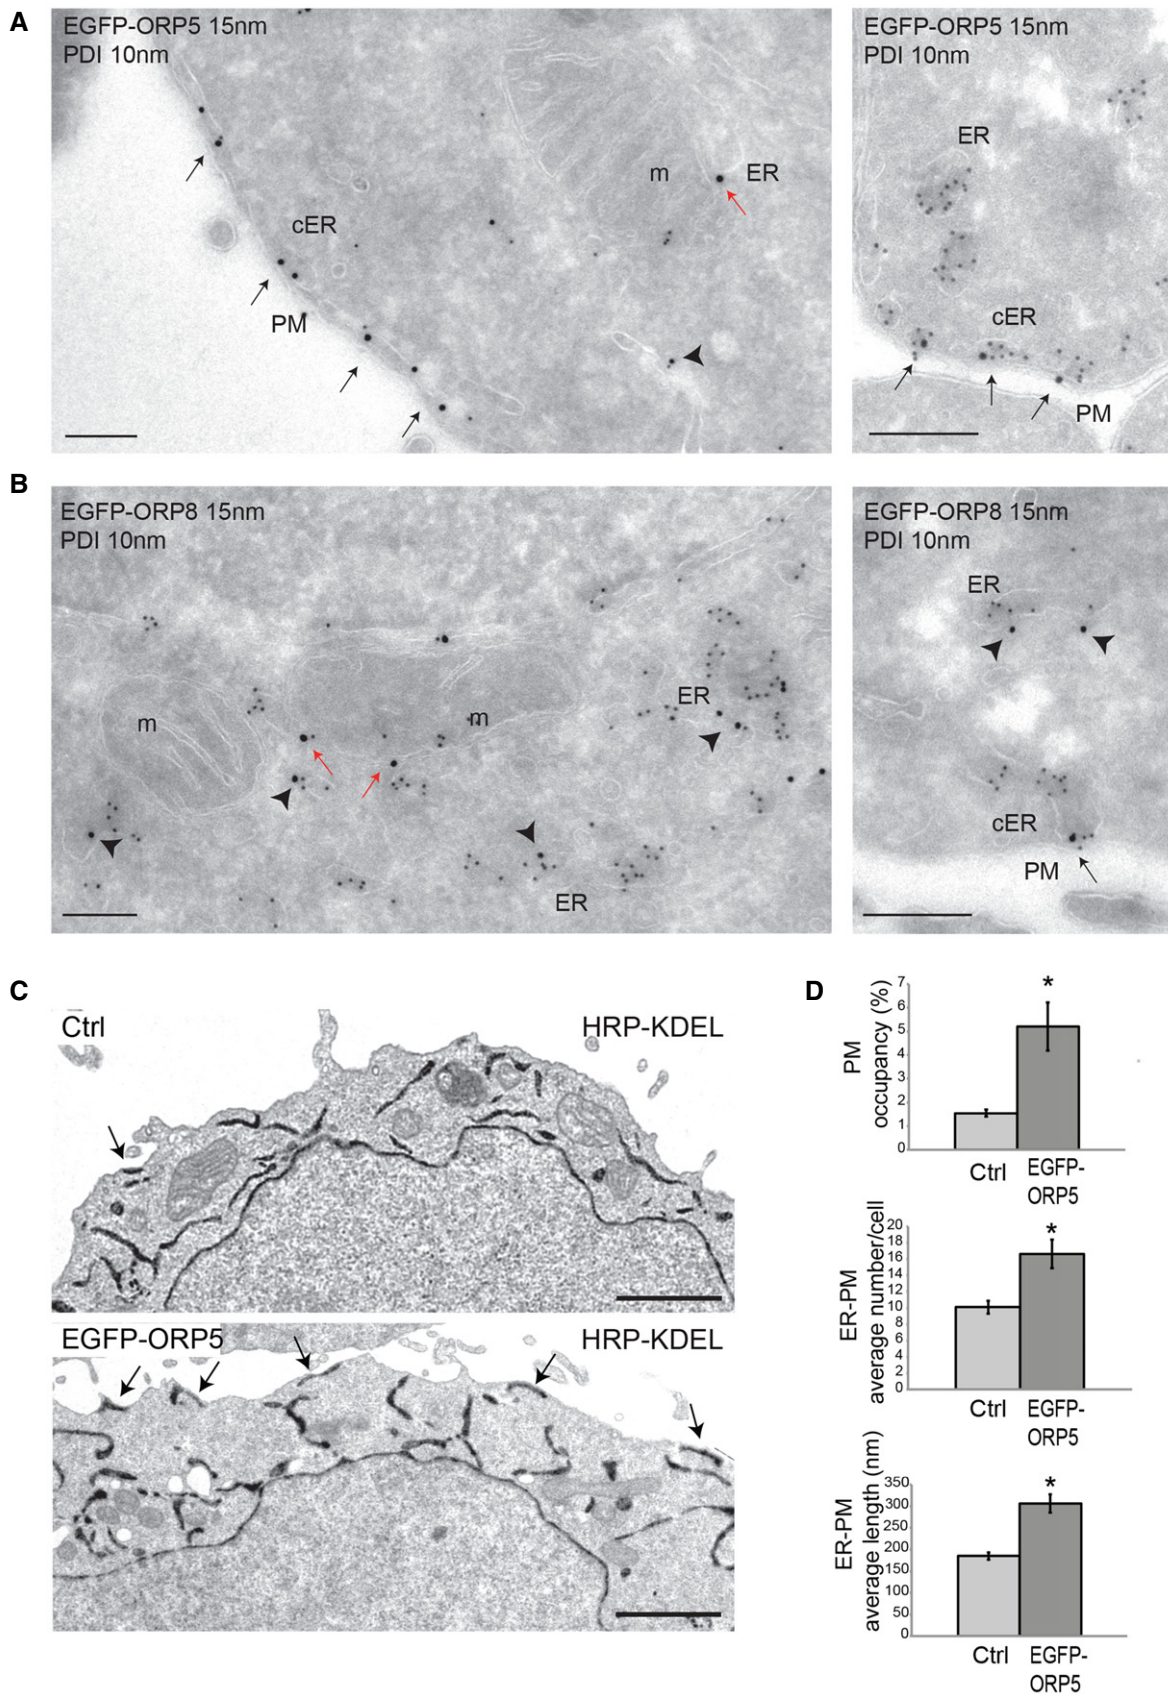

Figure EV1.

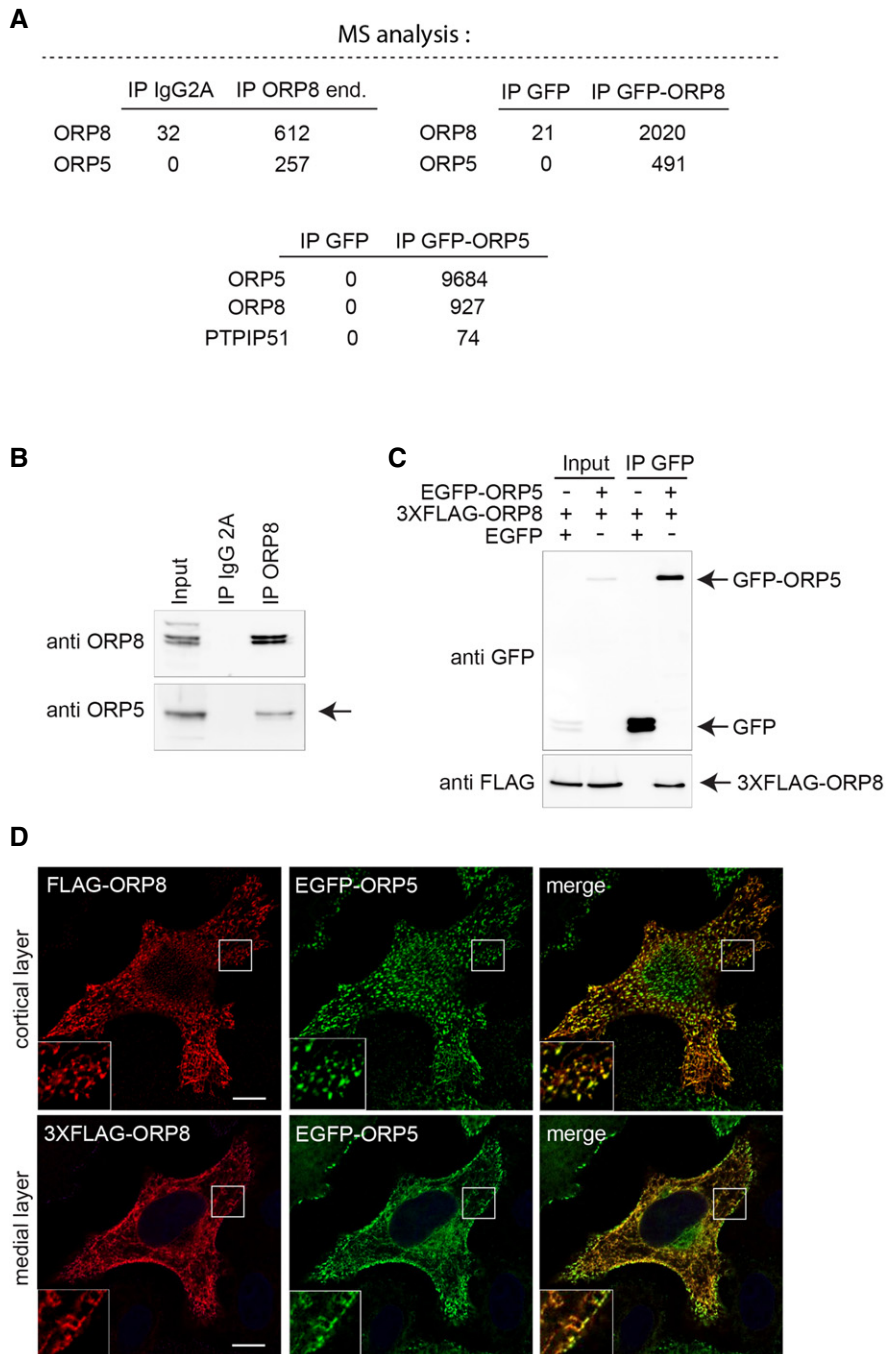**Figure EV2. ORP5 and ORP8 interaction.**

- A** Mass spectrometry (MS) analysis on immunoprecipitated endogenous ORP8 or overexpressed EGFP-ORP8 or EGFP-ORP5 indicates ORP5 or ORP8 as the major interacting partners. Note the presence of PTPIP51 in the MS of EGFP-ORP5 immunoprecipitates.
- B** Immunoprecipitation of endogenous ORP8 reveals interaction with endogenous ORP5 (arrow).
- C** EGFP-ORP5 or EGFP alone were immunoprecipitated from lysates of HeLa cells co-expressing EGFP or EGFP-ORP5 with 3XFLAG-ORP8 and analyzed by Western blot using antibodies against GFP (for ORP5) or FLAG (for ORP8).
- D** Fluorescent images of HeLa cells co-transfected with EGFP-ORP5 and 3XFLAG-ORP8 and stained with anti-FLAG. Cortical layer (upper panel) and medial layer (lower panel) of the same cell are shown. Scale bar, 10  $\mu$ m.

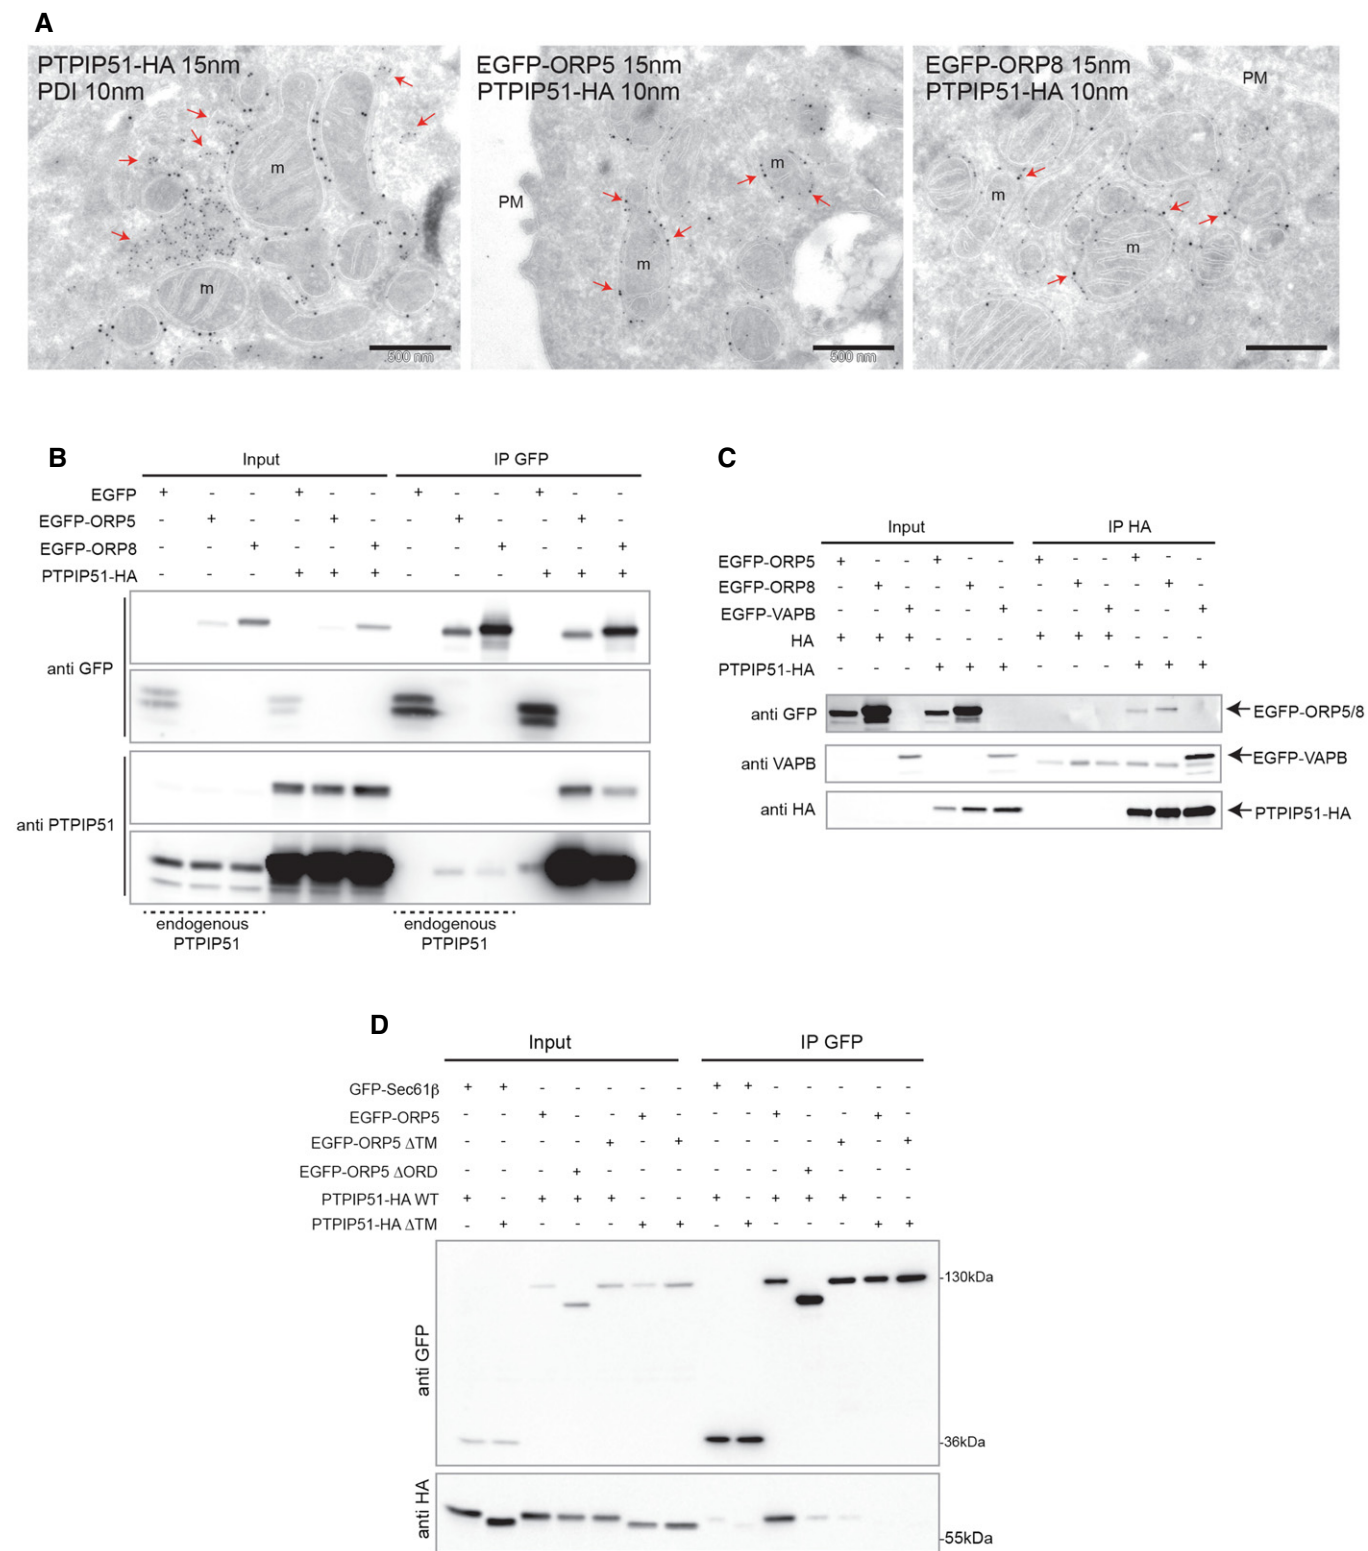

Figure EV3.

**Figure EV3. ORP5 and ORP8 localization at ER–mitochondria contacts is promoted by the mitochondrial protein PTPIP51.**

- A Electron micrographs of ultrathin cryosections of HeLa cells transfected with PTPIP51-HA alone, or with EGFP-ORP5 and EGFP-ORP8 together with PTPIP51-HA and double-immunogold stained with anti-PDI to detect the ER (10 nm gold) and anti-HA (15 nm gold) to detect PTPIP51 or with anti-GFP (15 nm gold) to detect ORP5 or ORP8 and anti-HA (10 nm gold) to detect PTPIP51. Red arrows indicate PDI in the lumen of ER structures not in contact with mitochondria, and ORP5 or ORP8 at ER–mitochondria contact sites. Scale bar, 500 nm.
- B EGFP, EGFP-ORP5, or EGFP-ORP8 were immunoprecipitated from lysates of HeLa cells co-expressing or not PTPIP51-HA and analyzed by Western blot using antibodies against GFP and PTPIP51 to detect endogenous and overexpressed proteins.
- C PTPIP51-HA was immunoprecipitated from lysates of HeLa cells co-expressing EGFP, EGFP-ORP5, or EGFP-ORP8 and analyzed by Western blot using antibodies against GFP and HA.
- D GFP-Sec61 $\beta$ , EGFP-ORP5, EGFP-ORP5 $\Delta$ TM, or EGFP-ORP5 $\Delta$ ORD were immunoprecipitated from lysates of HeLa cells co-expressing PTPIP51-HA or PTPIP51-HA  $\Delta$ TM and analyzed by Western blot using antibodies against GFP and HA.



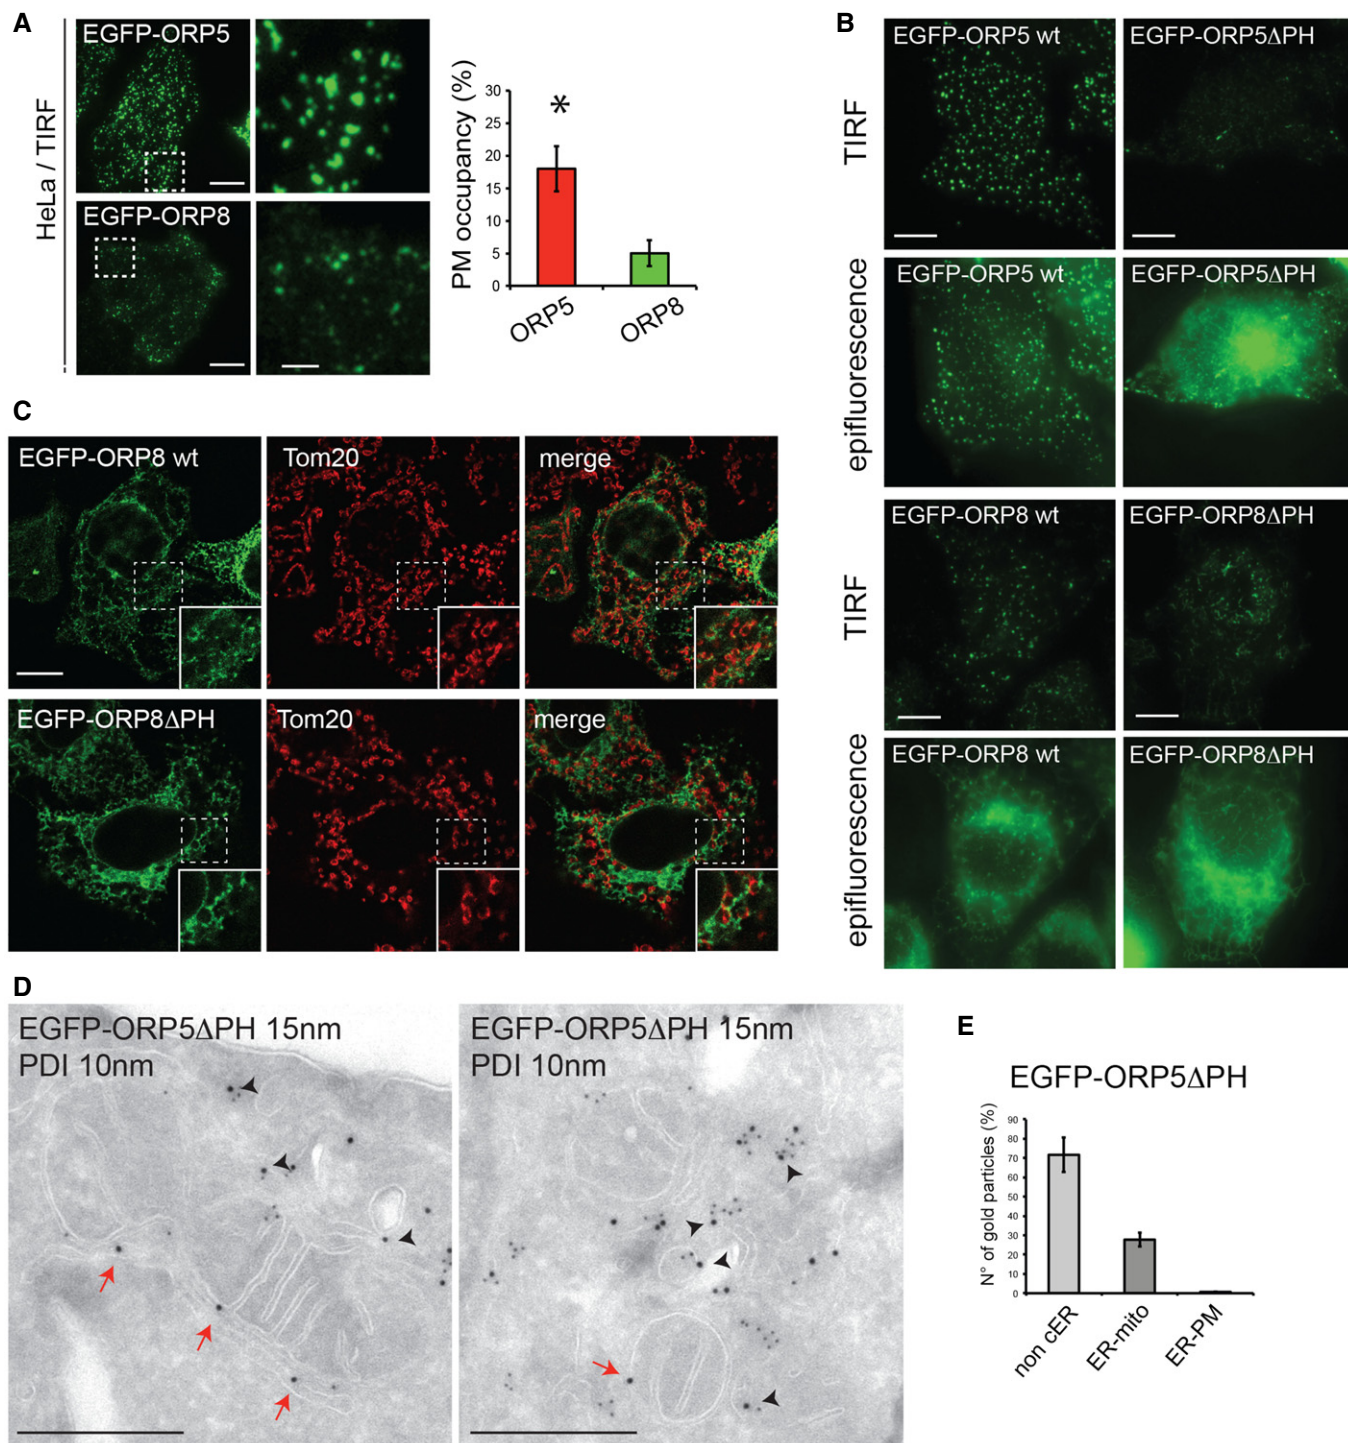

Figure EV4.

**Figure EV4. Recruitment of ORP5 and ORP8 to ER–mitochondria contact sites.**

- A TIRF microscopy of HeLa cells overexpressing EGFP-ORP5 or EGFP-ORP8 showing the localization of these proteins within the evanescent field (100 nm from the PM). Scale bar, 10  $\mu$ m. Quantifications of the TIRF microscopy showing the percentage of PM occupied by cER ( $\% \pm$  SEM,  $n = 8$  for each of 3 biological replicates,  $*P < 0.001$ ).
- B Representative TIRF microscopy images (upper panel) and corresponding epifluorescence images (lower panel) of HeLa cells expressing EGFP-ORP5, EGFP-ORP5 $\Delta$ PH, EGFP-ORP8, or EGFP-ORP8 $\Delta$ PH. Scale bar, 10  $\mu$ m.
- C Confocal images of HeLa cells transfected with EGFP-ORP8 or EGFP-ORP8 $\Delta$ PH and immunostained using anti-TOM20 antibody to visualize mitochondria. Scale bar, 10  $\mu$ m.
- D Electron micrographs of ultrathin cryosections of HeLa cells transfected with EGFP-ORP5 $\Delta$ PH and immunogold stained with anti-GFP (15 nm gold) to detect ORP5 $\Delta$ PH and anti-PDI (10 nm gold) to detect the ER. Red arrows indicate EGFP-ORP5 $\Delta$ PH at ER–mitochondria contact sites. Black arrowheads indicate EGFP-ORP5 $\Delta$ PH in the reticular ER. Scale bar, 200 nm.
- E Quantification of the IEM labeling for EGFP-ORP5 $\Delta$ PH in transfected HeLa cells. Results are presented as the percentage of the total number of gold particles (800 per conditions) for ORP5 $\Delta$ PH in the indicated compartments (non-cER, non-cortical ER; ER-mito, ER–mitochondria contact sites; ER-PM, ER–PM contact sites). % gold particles  $\pm$  SEM,  $n = 32$  cells,  $*P < 0.001$  compared to non-cER and ER-mito and to ER-PM.
