# Supplementary material
Source: PubMed Central journal article supplement (PMC5278607)
Supplement: EMBR-17-800-s003.pdf [file EMBR-17-800-s003.pdf]

EGFP-ORP5 15 nm  
PDI 10 nm

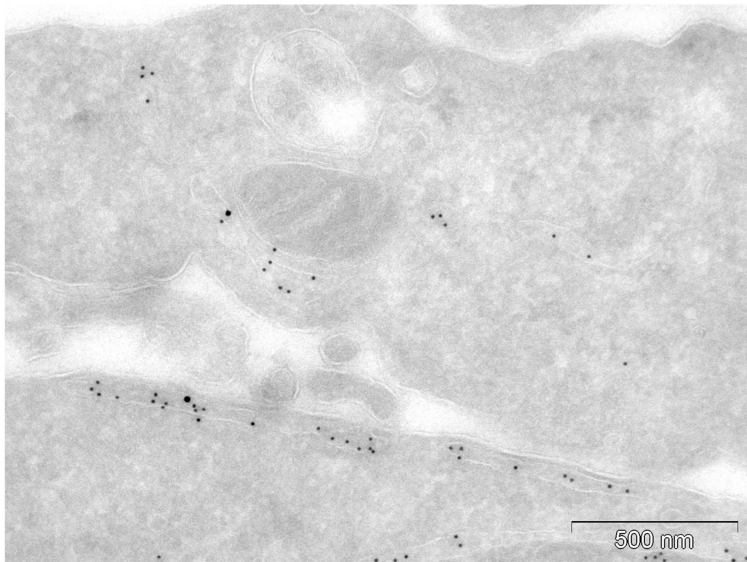

EGFP-ORP5 15 nm  
PDI 10 nm

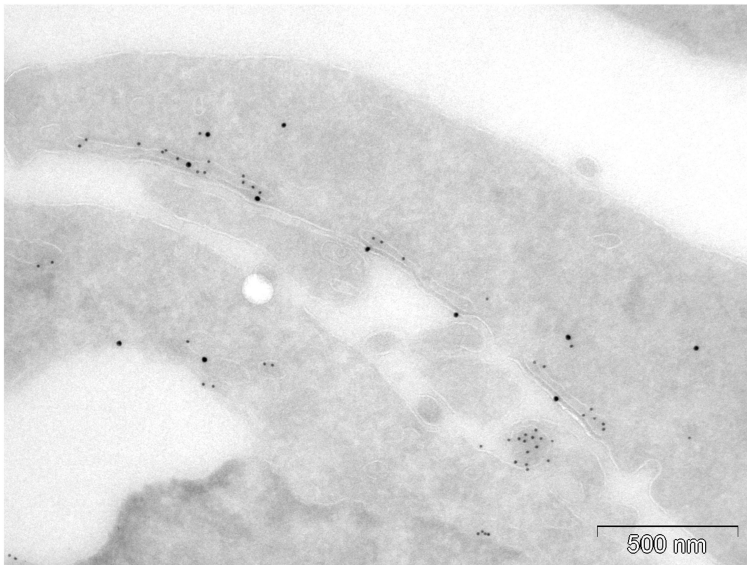

EGFP-ORP8 15 nm  
PDI 10 nm

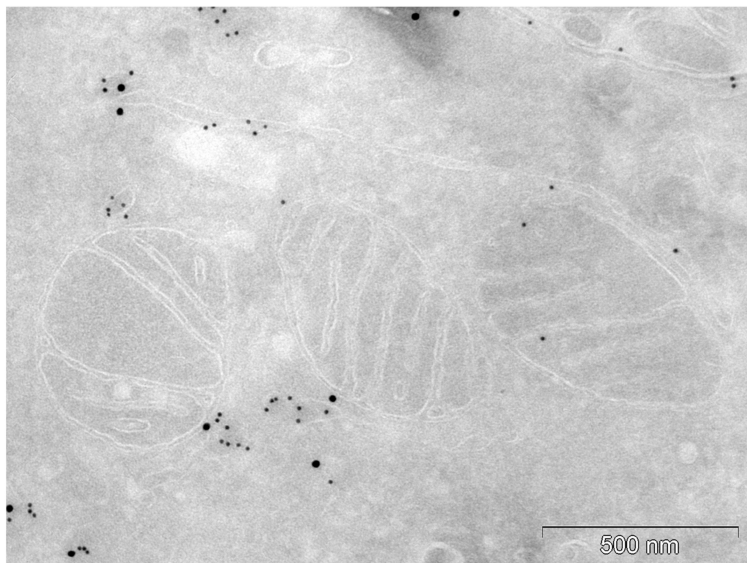

**Source Images for Figure 1C**

Exposure time 3 sec:

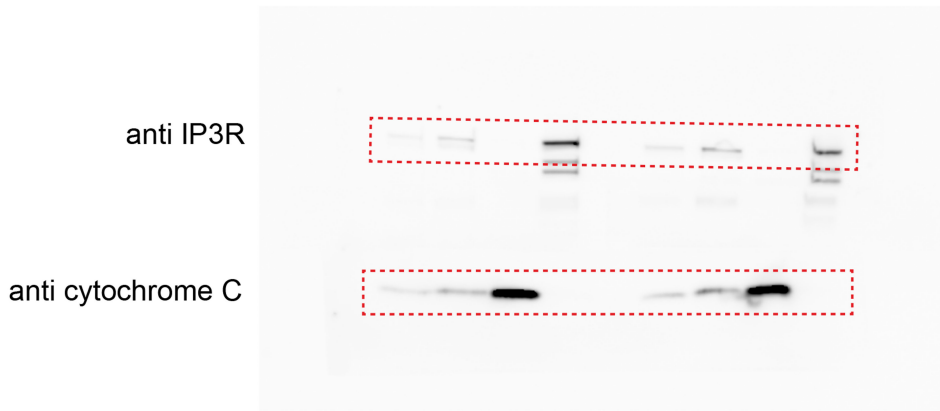

Exposure time 2 min:

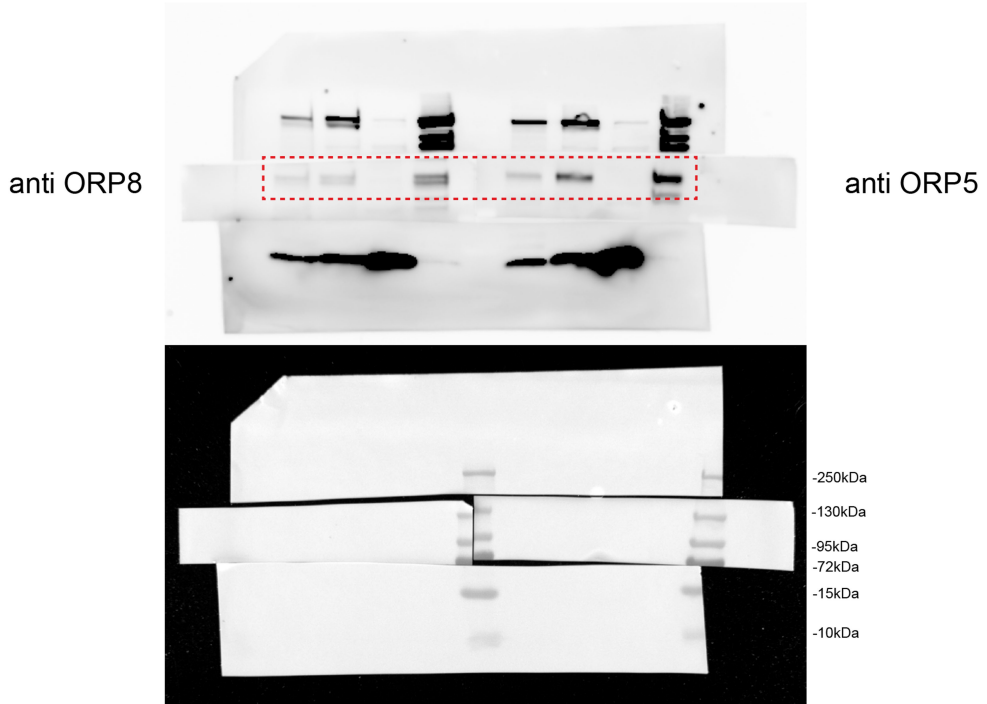

Exposure time 5 min (after stripping):

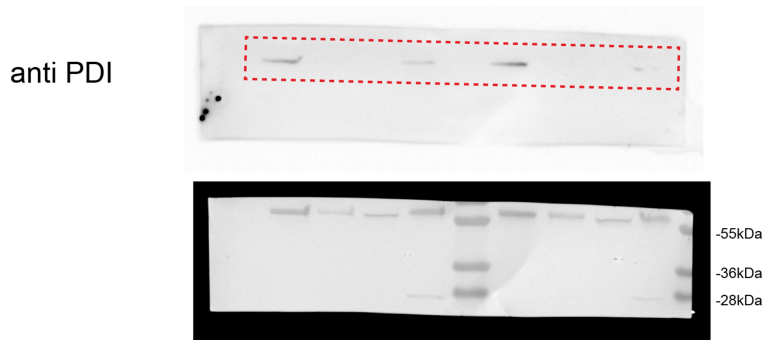

Source Images for Figure 11
