# Supplementary material
Source: PubMed Central journal article supplement (PMC5278607)

EGFP-ORP5 15 nm  
PTPIP51-HA 10 nm

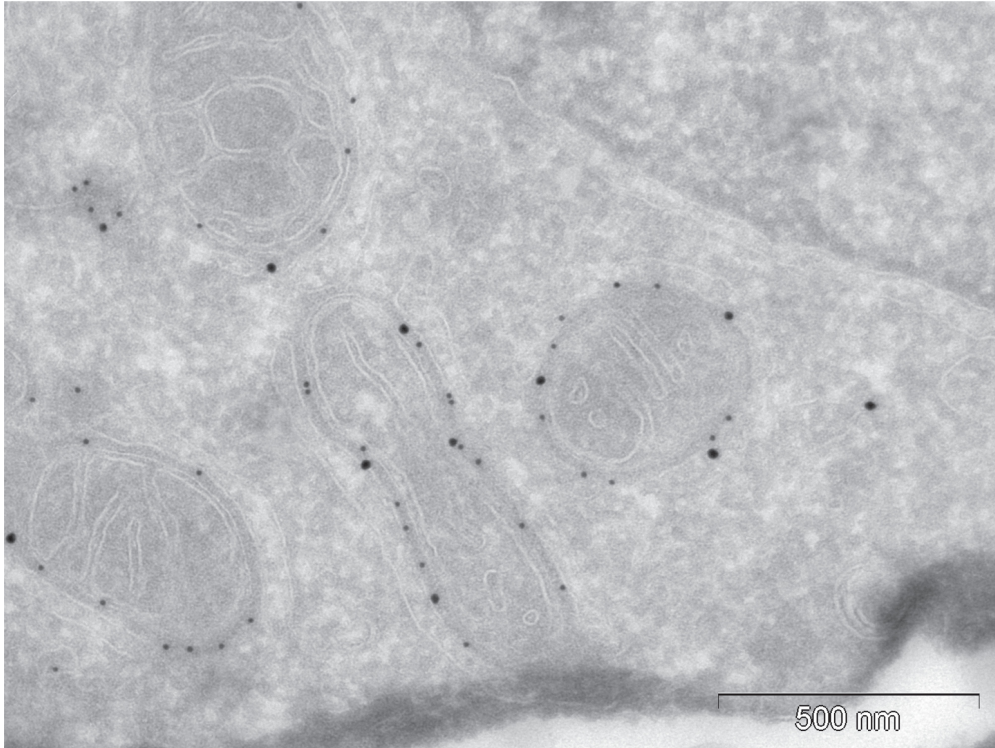

**Source image for Figure 2B**

EGFP-ORP5 15 nm  
PTPIP51-HA 10 nm

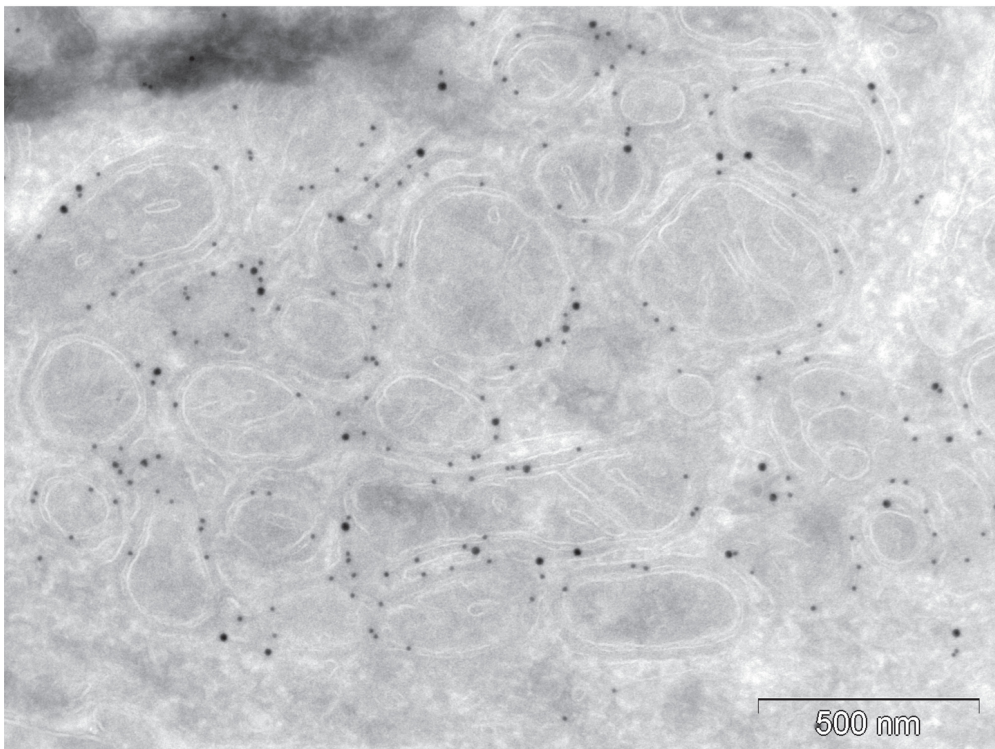

**Additional image for Figure 2B**

HRP-KDEL

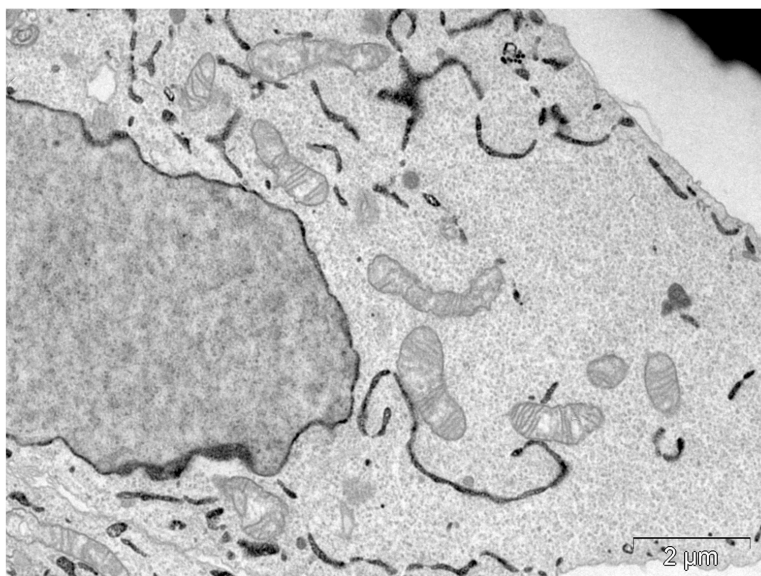

HRP-KDEL  
+  
PTPIP51-HA

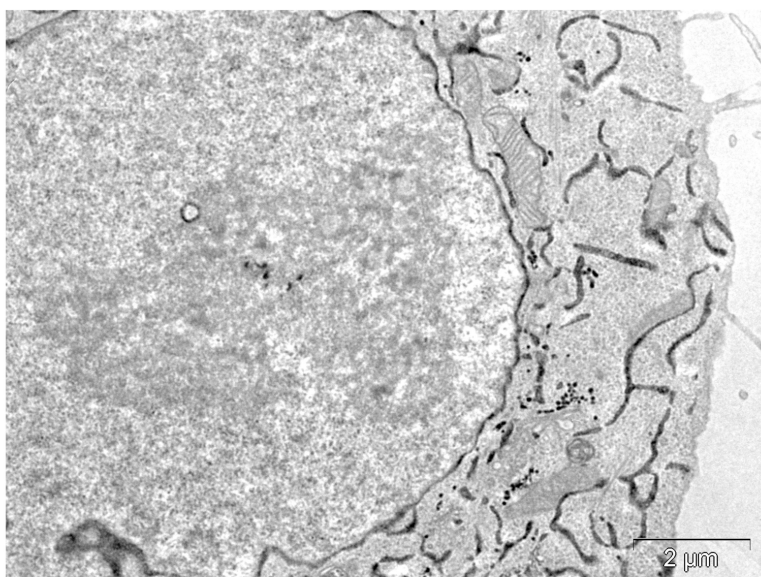

HRP-KDEL  
+  
PTPIP51-HA  
+  
EGFP-ORP5

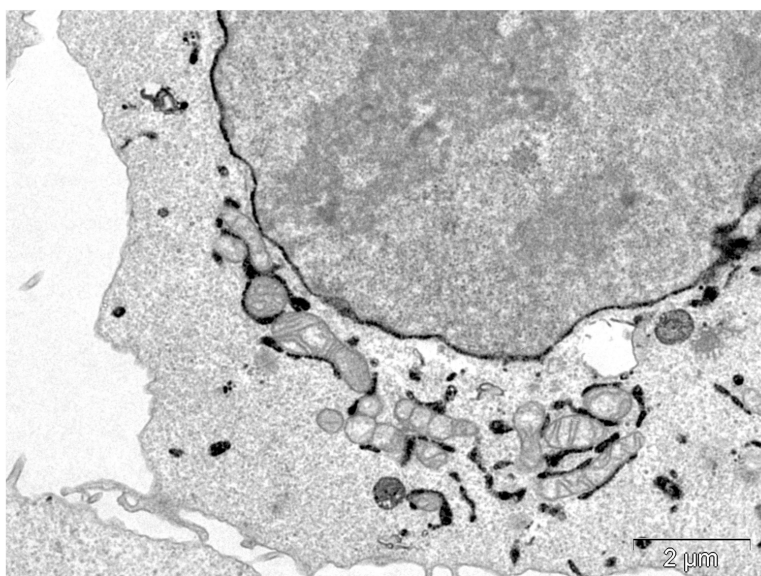

Source Images for Figure 2E

anti GFP

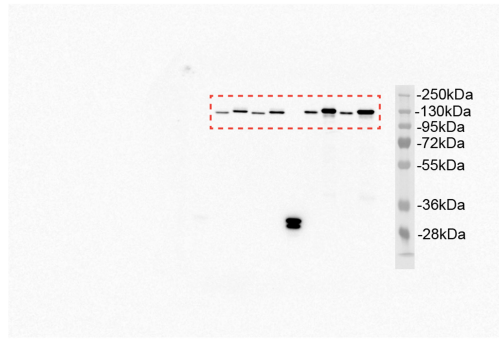

anti HA (PTPIP51)

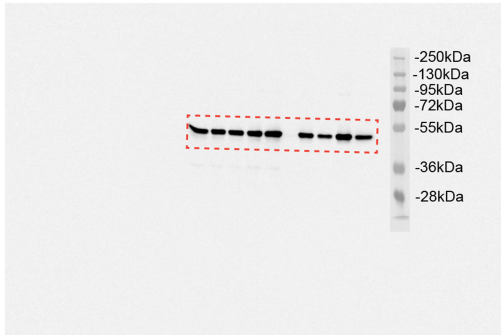

anti VAPB

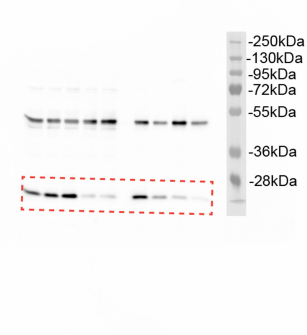

anti Tubulin

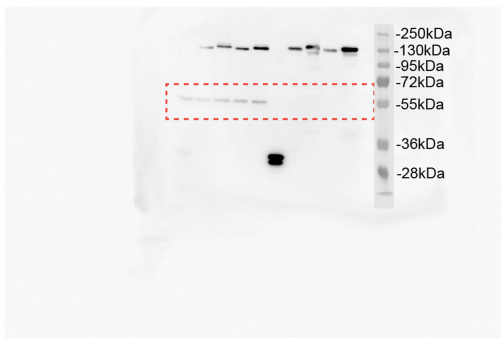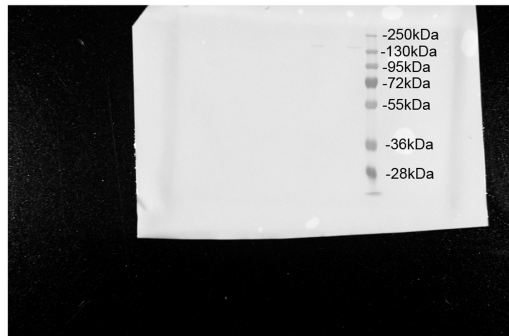

anti VAPA

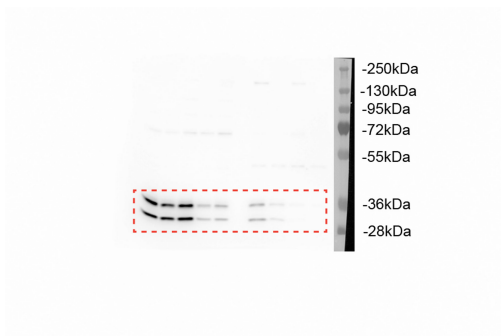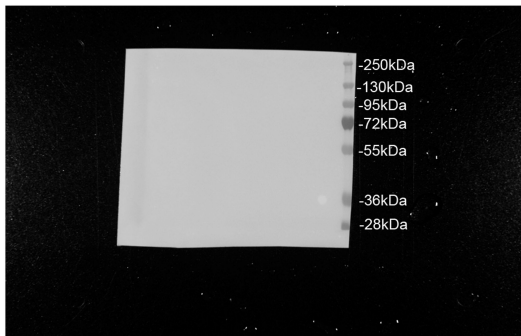

Supplement: EMBR-17-800-s004.pdf [file EMBR-17-800-s004.pdf]
