# Supplementary material
Source: PubMed Central journal article supplement (PMC5278607)

anti GFP

Exposure time 3 sec:

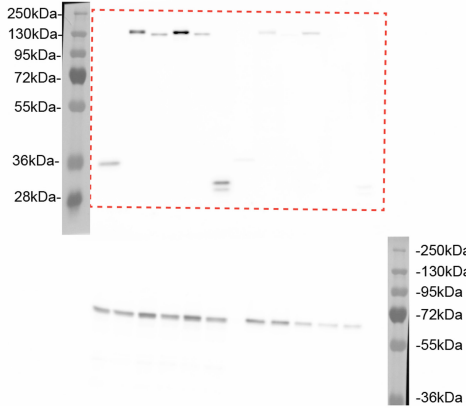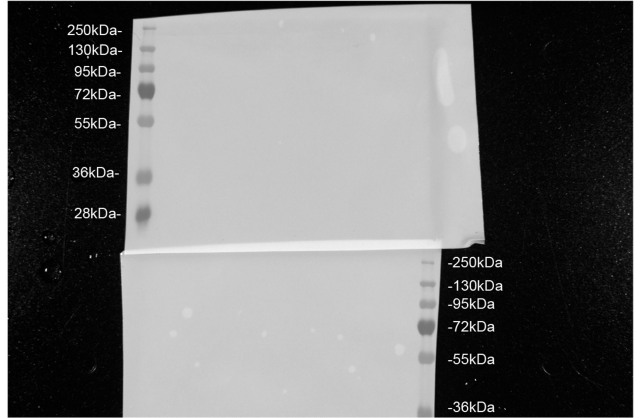

anti HA (PTPIP51)

Exposure time 5 sec:

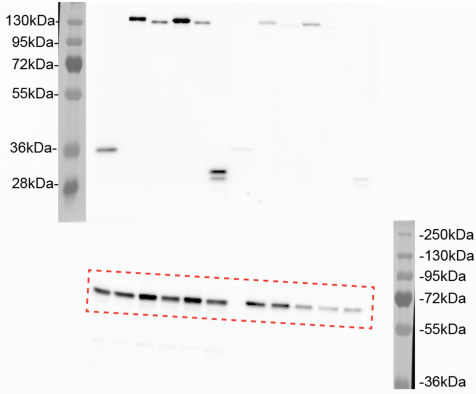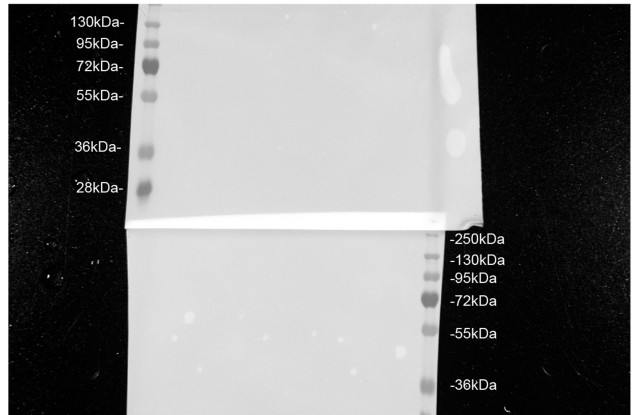

Supplement: EMBR-17-800-s005.pdf [file EMBR-17-800-s005.pdf]

siCtrl

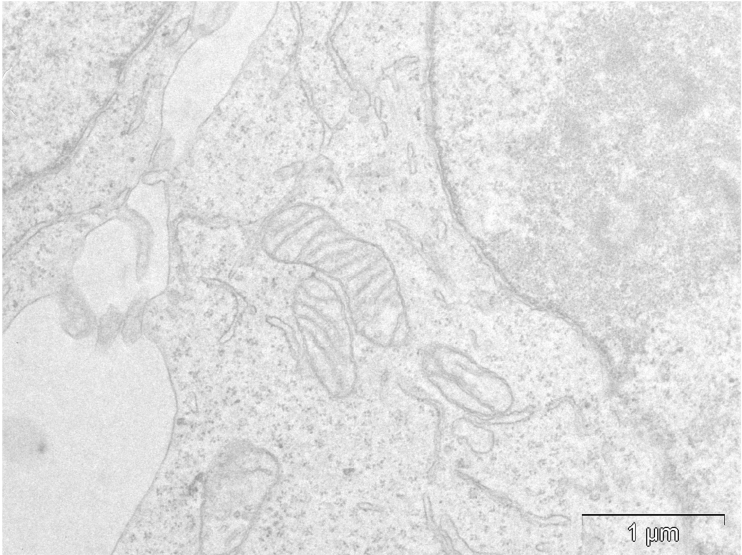

siORP5

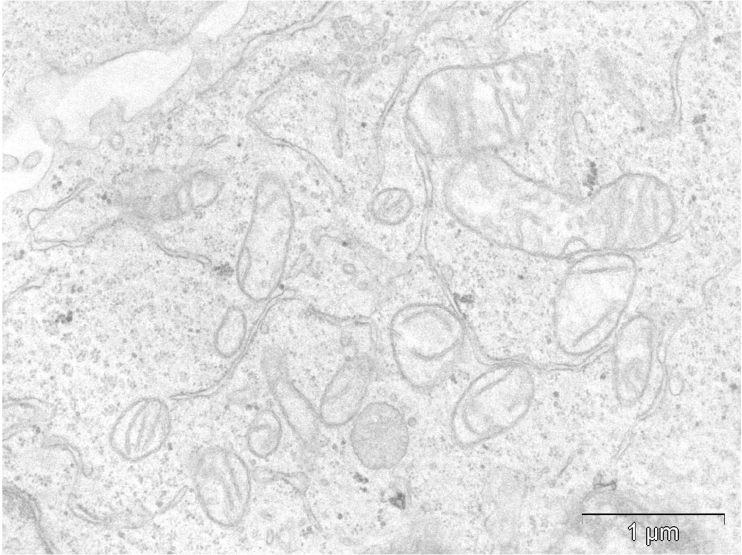

siORP8

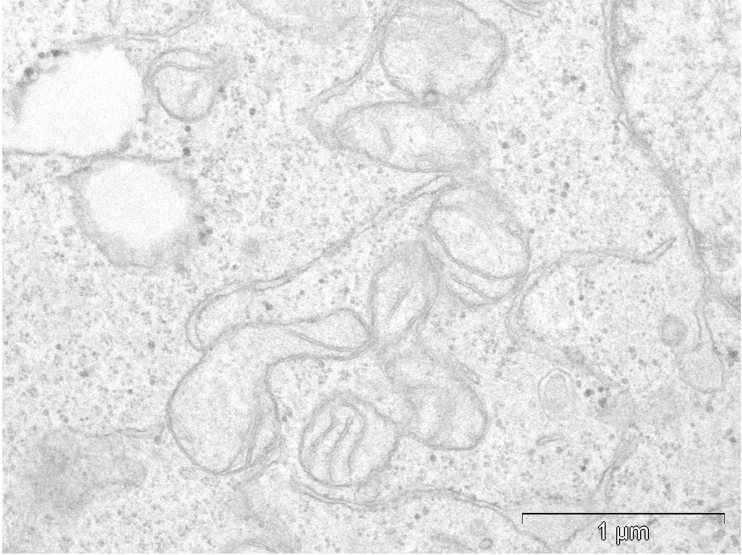

Source Images for Figure 4C

Supplement: EMBR-17-800-s006.pdf [file EMBR-17-800-s006.pdf]
